# Supplementary material
Source: HighWire-hosted journal article supplement (https://qualitysafety.bmj.com/content/32/10/573)
Supplement: inline-supplementary-material-1 [file inline-supplementary-material-1.pdf]

**Appendix 1: Search strategy for MEDLINE**

| <b>Concept A: Ambulance Staff</b>                                                                                                                                                                                                                                                                                                                                                                                                                                                                                                                                                                                                                                                               | <b>Concept B: Feedback</b>                                                                                                                                                                                                                | <b>Concept C: Feedback Content</b>                                                                                                                                                                                                                                                                                                                                                                                                                                                                                                                     |
|-------------------------------------------------------------------------------------------------------------------------------------------------------------------------------------------------------------------------------------------------------------------------------------------------------------------------------------------------------------------------------------------------------------------------------------------------------------------------------------------------------------------------------------------------------------------------------------------------------------------------------------------------------------------------------------------------|-------------------------------------------------------------------------------------------------------------------------------------------------------------------------------------------------------------------------------------------|--------------------------------------------------------------------------------------------------------------------------------------------------------------------------------------------------------------------------------------------------------------------------------------------------------------------------------------------------------------------------------------------------------------------------------------------------------------------------------------------------------------------------------------------------------|
| (Ambulances or "Emergency Medical Technician" or "Air Ambulances" or "Emergency Medical Services" or Triage or Hotlines or "Call Centers" or "Emergency Medical Dispatch").sh. or (Paramedic* or EMS or Prehospital or Pre-hospital or "first responder*" or "emergency medical technician*" or "emergency service*" or Ambulance* or HEMS or "field triage" or "out-of-hospital" or 999 or 911 or 9-1-1 or dispatch* or EMD or "control cent*" or "call cent*" or "call handler*" or "call operator*" or "call?taker*" or "emergency operator*" or "telephone triage" or "emergency telecommunication" or TCPR or "emergency communication" ).tw. or (EMT* not (cancer or gene or tumo?r)).tw. | feedback.sh. or (feedback or post?box or debrief* or dashboard* or "clinical safety charts" or "extensive review" or "review sessions" or "follow?up tool" or "report* back or benchmark* or scorecard* or appraisal* or feedforward).tw. | (Quality Improvement or Quality of Health Care).sh. or ("clinical outcome*" or (chang* adj3 behavio?r) or performance or "quality of care" or conveyance or "quality improvement*" or "service improvement*" or "professional development" or "patient outcome*" or diagnos?s or (quality adj3 ("chest compression*" or CPR or "cardio?pulmonary resuscitation" or ALS)) or "treatment time*" or "coroners report*" or (adher* adj2 (system* or guideline*)) or "quality data" or decision?making or "patient safety" or well?being or reflection).tw. |

## Appendix 2: Data extraction template

| OVERALL CATEGORY      | SPECIFIC CATEGORY                      | OPTIONS (IF APPLICABLE)                                               |                                               |
|-----------------------|----------------------------------------|-----------------------------------------------------------------------|-----------------------------------------------|
| Reference information | Author                                 |                                                                       |                                               |
|                       | Title                                  |                                                                       |                                               |
|                       | Year                                   |                                                                       |                                               |
|                       | Journal                                |                                                                       |                                               |
| Study overview        | Study country                          |                                                                       |                                               |
|                       | Study category                         | 1 – Interventional feedback study                                     |                                               |
|                       |                                        | 2 – Non-interventional feedback study                                 |                                               |
|                       |                                        | 3 – Other study with feedback element                                 |                                               |
|                       | Context                                | <i>e.g. paramedic emergency services, emergency operations centre</i> |                                               |
|                       | Study MMAT category & study design     | Qualitative                                                           | Ethnography                                   |
|                       |                                        |                                                                       | Phenomenology                                 |
|                       |                                        |                                                                       | Narrative research                            |
|                       |                                        |                                                                       | Grounded theory                               |
|                       |                                        |                                                                       | Case study                                    |
|                       |                                        |                                                                       | Qualitative description                       |
|                       |                                        | Quantitative RCT                                                      | RCT                                           |
|                       |                                        | Quantitative non randomised                                           | Non-RCT                                       |
|                       |                                        |                                                                       | Cohort study                                  |
|                       |                                        |                                                                       | Case-control study                            |
|                       |                                        |                                                                       | Cross-sectional analytic study                |
|                       |                                        |                                                                       | Time series                                   |
|                       |                                        | Quantitative descriptive                                              | Incidence/prevalence study without comparison |
|                       |                                        |                                                                       | Survey                                        |
|                       |                                        |                                                                       | Case series                                   |
|                       |                                        |                                                                       | Case report                                   |
|                       |                                        | Mixed methods                                                         | Convergent design                             |
|                       |                                        |                                                                       | Sequential explanatory design                 |
|                       |                                        |                                                                       | Sequential exploratory design                 |
|                       | Study design as defined by the authors |                                                                       |                                               |
|                       | Study purpose                          |                                                                       |                                               |
|                       | Study's definition of feedback         |                                                                       |                                               |
|                       | Study findings                         |                                                                       |                                               |
|                       | Suggested further study                |                                                                       |                                               |
| Study                 | Number                                 |                                                                       |                                               |

|                                                  |                                                                         |                                                                                                                                                                                                                                             |
|--------------------------------------------------|-------------------------------------------------------------------------|---------------------------------------------------------------------------------------------------------------------------------------------------------------------------------------------------------------------------------------------|
| participants                                     | Professional background                                                 |                                                                                                                                                                                                                                             |
|                                                  | Reported demographics                                                   |                                                                                                                                                                                                                                             |
| Study outcome measures (+ corresponding results) | Staff wellbeing                                                         |                                                                                                                                                                                                                                             |
|                                                  | Quality + safety of patient care                                        |                                                                                                                                                                                                                                             |
|                                                  | Professional development                                                |                                                                                                                                                                                                                                             |
|                                                  | Clinical decision-making                                                |                                                                                                                                                                                                                                             |
|                                                  | Other clinically relevant outcomes                                      |                                                                                                                                                                                                                                             |
| Interventional study characteristics             | Brief name                                                              |                                                                                                                                                                                                                                             |
|                                                  | Patient condition studied                                               |                                                                                                                                                                                                                                             |
|                                                  | Targeted behaviour                                                      |                                                                                                                                                                                                                                             |
|                                                  | Direction of change required                                            | Increase current behaviour/Decrease current behaviour/Change behaviour or mix/Unclear                                                                                                                                                       |
|                                                  | Baseline performance                                                    | Above average/Average/Below average/Not reported                                                                                                                                                                                            |
|                                                  | Extent to which the intervention was delivered as planned               |                                                                                                                                                                                                                                             |
|                                                  | Was there a significant positive effect on the primary outcome measure? |                                                                                                                                                                                                                                             |
|                                                  | Source                                                                  | Hospital/Ambulance service managers/Peers/Patients                                                                                                                                                                                          |
|                                                  | Content                                                                 |                                                                                                                                                                                                                                             |
|                                                  | Mode                                                                    |                                                                                                                                                                                                                                             |
|                                                  | Format                                                                  |                                                                                                                                                                                                                                             |
|                                                  | Visual or graphical elements                                            |                                                                                                                                                                                                                                             |
|                                                  | Frequency                                                               |                                                                                                                                                                                                                                             |
|                                                  | Duration of intervention                                                |                                                                                                                                                                                                                                             |
|                                                  | Lag-time                                                                |                                                                                                                                                                                                                                             |
|                                                  | Time/resources involved in generating feedback                          |                                                                                                                                                                                                                                             |
|                                                  | Study length                                                            |                                                                                                                                                                                                                                             |
|                                                  | Recipient level                                                         | Individual/Group/Individual+group                                                                                                                                                                                                           |
|                                                  | Patient cases                                                           | Individual/Aggregate/Individual+aggregate                                                                                                                                                                                                   |
|                                                  | Feedback alone or multifaceted intervention                             | Feedback alone<br>Feedback + reminders<br>Feedback + educational outreach<br>Feedback + educational intervention<br>Feedback + organisational interventions<br>Feedback + financial incentives<br>Feedback + patient-mediated interventions |
|                                                  | Push or pull model?                                                     | Push model/Pull model/Unclear                                                                                                                                                                                                               |
|                                                  | Recipient participation                                                 | Yes/No/Unclear                                                                                                                                                                                                                              |
|                                                  | Message framing                                                         |                                                                                                                                                                                                                                             |
|                                                  | Comparator                                                              |                                                                                                                                                                                                                                             |
|                                                  | Instructions for improvement                                            | Explicit, measurable target/Action                                                                                                                                                                                                          |

|                                          |                                                                                               |                                                                                                                                                   |
|------------------------------------------|-----------------------------------------------------------------------------------------------|---------------------------------------------------------------------------------------------------------------------------------------------------|
|                                          |                                                                                               | plan/Both/Neither                                                                                                                                 |
|                                          | Action plans accompanying the feedback                                                        |                                                                                                                                                   |
|                                          | Underlying theory                                                                             |                                                                                                                                                   |
|                                          | Feedback categories                                                                           | Audit & feedback/Post-event debriefing/Peer-to-peer feedback/Incident prompted feedback/Audit & patient outcome feedback/Patient outcome feedback |
| Non-interventional study characteristics | Current provision                                                                             |                                                                                                                                                   |
|                                          | Feedback content                                                                              |                                                                                                                                                   |
|                                          | Motives for seeking feedback                                                                  |                                                                                                                                                   |
|                                          | Mechanisms for feedback                                                                       |                                                                                                                                                   |
|                                          | Barriers                                                                                      |                                                                                                                                                   |
|                                          | Moderators                                                                                    |                                                                                                                                                   |
|                                          | Antecedents: Feedback recipient                                                               |                                                                                                                                                   |
|                                          | Antecedents: Context                                                                          |                                                                                                                                                   |
| <u>Mixed methods appraisal tool</u>      | Are there clear research questions?                                                           | Yes/No/Can't tell                                                                                                                                 |
|                                          | Do the collected data allow to address the research questions?                                | Yes/No/Can't tell                                                                                                                                 |
| Qualitative                              | Is the qualitative approach appropriate to answer the research question?                      | Yes/No/Can't tell                                                                                                                                 |
|                                          | Are the qualitative data collection methods adequate to address the research question?        | Yes/No/Can't tell                                                                                                                                 |
|                                          | Are the findings adequately derived from the data?                                            | Yes/No/Can't tell                                                                                                                                 |
|                                          | Is the interpretation of results sufficiently substantiated by data?                          | Yes/No/Can't tell                                                                                                                                 |
|                                          | Is there coherence between qualitative data sources, collection, analysis and interpretation? | Yes/No/Can't tell                                                                                                                                 |
| Quantitative RCTs                        | Is randomization appropriately performed?                                                     | Yes/No/Can't tell                                                                                                                                 |
|                                          | Are the groups comparable at baseline?                                                        | Yes/No/Can't tell                                                                                                                                 |
|                                          | Are there complete outcome data?                                                              | Yes/No/Can't tell                                                                                                                                 |
|                                          | Are outcome assessors blinded to the intervention provided?                                   | Yes/No/Can't tell                                                                                                                                 |
|                                          | Did the participants adhere to the assigned intervention?                                     | Yes/No/Can't tell                                                                                                                                 |
| Quantitative non-randomised              | Are the participants representative of the target population?                                 | Yes/No/Can't tell                                                                                                                                 |
|                                          | Are measurements appropriate regarding both the outcome and intervention (or exposure)?       | Yes/No/Can't tell                                                                                                                                 |

|                          |                                                                                                                    |                   |
|--------------------------|--------------------------------------------------------------------------------------------------------------------|-------------------|
|                          | Are there complete outcome data? <sup>2</sup>                                                                      | Yes/No/Can't tell |
|                          | Are the confounders accounted for in the design and analysis?                                                      | Yes/No/Can't tell |
|                          | During the study period, is the intervention administered (or exposure occurred) as intended?                      | Yes/No/Can't tell |
| Quantitative descriptive | Is the sampling strategy relevant to address the research question?                                                | Yes/No/Can't tell |
|                          | Is the sample representative of the target population?                                                             | Yes/No/Can't tell |
|                          | Are the measurements appropriate?                                                                                  | Yes/No/Can't tell |
|                          | Is the risk of nonresponse bias low?                                                                               | Yes/No/Can't tell |
|                          | Is the statistical analysis appropriate to answer the research question?                                           | Yes/No/Can't tell |
| Mixed methods            | Is there an adequate rationale for using a mixed methods design to address the research question?                  | Yes/No/Can't tell |
|                          | Are the different components of the study effectively integrated to answer the research question?                  | Yes/No/Can't tell |
|                          | Are the outputs of the integration of qualitative and quantitative components adequately interpreted?              | Yes/No/Can't tell |
|                          | Are divergences and inconsistencies between quantitative and qualitative results adequately addressed?             | Yes/No/Can't tell |
|                          | Do the different components of the study adhere to the quality criteria of each tradition of the methods involved? | Yes/No/Can't tell |

## Appendix 3: Details of included studies

*Interventional feedback studies within EMS – Evaluative studies (n=36)*

| Author                    | Year | Country     | Context                          | MMAT category               | Study design                  | Quality assessment | Number of participants | Professional background                    | Outcome measures/findings                                                                                                                                                             |
|---------------------------|------|-------------|----------------------------------|-----------------------------|-------------------------------|--------------------|------------------------|--------------------------------------------|---------------------------------------------------------------------------------------------------------------------------------------------------------------------------------------|
| <b>Bahouth</b>            | 2022 | Israel      | Paramedic Emergency Services     | Quantitative non randomised | Cohort study                  | Low-moderate       | 518                    | Emergency Medical Technicians + Paramedics | <ul style="list-style-type: none"> <li>• Time in field</li> <li>• Field file not present</li> <li>• Neck collar fixation not performed</li> </ul>                                     |
| <b>Bleijenberg</b>        | 2017 | Netherlands | Paramedic Emergency Services     | Quantitative non randomised | Cross-sectional study         | High-moderate      | 124                    | Patients                                   | <ul style="list-style-type: none"> <li>• Number of delivered chest compressions in one minute</li> </ul>                                                                              |
| <b>Bobrow<sup>2</sup></b> | 2016 | USA         | Emergency Operations Centre      | Quantitative non randomised | Cross-sectional study         | High               | 2334                   | Patients                                   | <ul style="list-style-type: none"> <li>• Provision of telephone cardiopulmonary resuscitation</li> <li>• Survival to hospital discharge</li> </ul>                                    |
| <b>Brink</b>              | 2012 | Sweden      | Paramedic Emergency Services     | Qualitative                 | Qualitative descriptive study | High               | 10                     | Emergency Medical Technicians + Paramedics | <ul style="list-style-type: none"> <li>• Improved relationships with colleagues</li> <li>• Avoid repeating experienced colleagues' mistakes</li> <li>• Improved confidence</li> </ul> |
| <b>Choi</b>               | 2014 | USA         | Paramedic Emergency Services     | Quantitative non randomised | Cross-sectional study         | Low-moderate       | 1176                   | Patients                                   | <ul style="list-style-type: none"> <li>• Percentage of last known well time documented</li> <li>• Percentage of prenotification given</li> </ul>                                      |
| <b>Clawson</b>            | 1998 | USA         | Emergency Operations Centre      | Quantitative non randomised | Cross-sectional study         | Moderate           | 32                     | Emergency operations centre staff          | <ul style="list-style-type: none"> <li>• Mean overall compliance score</li> </ul>                                                                                                     |
| <b>Daudelin</b>           | 2012 | USA         | Paramedic Emergency Services     | Quantitative non randomised | Cross-sectional study         | High               | 6994                   | Patients                                   | <ul style="list-style-type: none"> <li>• Performance of a prehospital electrocardiogram</li> <li>• EMS run time</li> </ul>                                                            |
| <b>DelliFraine</b>        | 2013 | USA         | Ambulance Service - Organisation | Quantitative non randomised | Cohort study                  | High               | 24                     | EMS organisations                          | <ul style="list-style-type: none"> <li>• Median symptom to balloon time</li> </ul>                                                                                                    |

|                  |      |                 | nal Level                                |                                   |                              |                   |      |                                                               |                                                                                                                                                                                  |
|------------------|------|-----------------|------------------------------------------|-----------------------------------|------------------------------|-------------------|------|---------------------------------------------------------------|----------------------------------------------------------------------------------------------------------------------------------------------------------------------------------|
| <b>Ebbs</b>      | 2012 | Australia       | Paramedic<br>Emergency<br>Services       | Quantitative<br>non<br>randomised | Cross-<br>sectional<br>study | Low-<br>moderate  | 227  | Emergency<br>Medical<br>Technician +<br>Paramedic<br>Patients | <ul style="list-style-type: none"> <li>• Key performance indicator results</li> </ul>                                                                                            |
| <b>Eckstein</b>  | 1999 | USA             | Paramedic<br>Emergency<br>Services       | Quantitative<br>non<br>randomised | Cross-<br>sectional<br>study | Moderate          | 7103 |                                                               | <ul style="list-style-type: none"> <li>• Mortality rates amongst fallouts</li> <li>• Fallout rate of penetrating trauma patients with on scene times &gt;20 minutes</li> </ul>   |
| <b>Gevers</b>    | 2020 | South<br>Africa | Paramedic<br>Emergency<br>Services       | Quantitative<br>descriptive       | Survey                       | Moderate          | 50   | EMS<br>personnel                                              | <ul style="list-style-type: none"> <li>• Improved confidence</li> <li>• Making clinical shifts more enjoyable</li> <li>• Improved relationships with colleagues</li> </ul>       |
| <b>Gropen</b>    | 2019 | USA             | Emergency<br>Operations<br>Centre        | Quantitative<br>non<br>randomised | Cohort<br>study              | Moderate          | 24   | Paramedics/c<br>ommunicators                                  | <ul style="list-style-type: none"> <li>• Ability of EMS providers to predict large vessel occlusion</li> </ul>                                                                   |
| <b>Hardeland</b> | 2017 | Norway          | Emergency<br>Operations<br>Centre        | Quantitative<br>non<br>randomised | Cross-<br>sectional<br>study | Moderate          | 561  | Patients                                                      | <ul style="list-style-type: none"> <li>• Immediate recognition of cardiac arrest</li> <li>• Ambulance response interval</li> </ul>                                               |
| <b>Hermans</b>   | 2017 | Netherla<br>nds | Ambulance<br>Service<br>Organisatio<br>n | Quantitative<br>non<br>randomised | Cross-<br>sectional<br>study | High-<br>moderate | 441  | Patients                                                      | <ul style="list-style-type: none"> <li>• First medical contact to balloon time</li> </ul>                                                                                        |
| <b>Hopkins</b>   | 2016 | USA             | Paramedic<br>Emergency<br>Services       | Quantitative<br>non<br>randomised | Cross-<br>sectional<br>study | High-<br>moderate | 737  | Patients                                                      | <ul style="list-style-type: none"> <li>• Neurologically intact survivors</li> </ul>                                                                                              |
| <b>Hubner</b>    | 2017 | Austria         | Paramedic<br>Emergency<br>Services       | Quantitative<br>non<br>randomised | Cross-<br>sectional<br>study | High-<br>moderate | 2209 | Patient                                                       | <ul style="list-style-type: none"> <li>• Time to first medical contact</li> <li>• Hands-off interval longer than 30 seconds</li> <li>• Survival to hospital discharge</li> </ul> |
| <b>Joyce</b>     | 1997 | USA             | Paramedic<br>Emergency<br>Services       | Quantitative<br>non<br>randomised | Cross-<br>sectional<br>study | Moderate          | 1862 | Emergency<br>Medical<br>Technician +                          | <ul style="list-style-type: none"> <li>• Response time</li> <li>• Adequate documentation pertaining to physical exam</li> </ul>                                                  |

|                    |      |                         |                              |                             |                               |               |       |                                                 |                                                                                                                                                                                                                         |
|--------------------|------|-------------------------|------------------------------|-----------------------------|-------------------------------|---------------|-------|-------------------------------------------------|-------------------------------------------------------------------------------------------------------------------------------------------------------------------------------------------------------------------------|
|                    |      |                         |                              |                             |                               |               |       | Paramedic                                       | <ul style="list-style-type: none"> <li>• Protocol followed or deviation justified</li> <li>• Release at scene appropriate</li> </ul>                                                                                    |
| <b>Lukas</b>       | 2012 | Germany                 | Paramedic Emergency Services | Quantitative non randomised | Case-control study            | High-moderate | 295   | Paramedics & emergency physicians on ambulances | <ul style="list-style-type: none"> <li>• Observed return of spontaneous circulation</li> </ul>                                                                                                                          |
| <b>Lyon</b>        | 2012 | UK                      | Paramedic Emergency Services | Quantitative non randomised | Cross-sectional study         | Moderate      | 111   | Cardiac arrest traces                           | <ul style="list-style-type: none"> <li>• Median time-to-shock interval</li> </ul>                                                                                                                                       |
| <b>Niles</b>       | 2010 | USA                     | Paramedic Emergency Services | Quantitative non randomised | Cross-sectional study         | Moderate      | 178   | Patients                                        | <ul style="list-style-type: none"> <li>• Percentage of patients who had a prehospital electrocardiogram performed</li> <li>• False Primary Percutaneous Coronary Intervention activations by EMS</li> </ul>             |
| <b>Noble</b>       | 2020 | Rwanda                  | Paramedic Emergency Services | Mixed methods               | Sequential explanatory design | High          | 34    | Ambulance drivers, anaesthetists + nurses       | <ul style="list-style-type: none"> <li>• Increased motivation</li> </ul>                                                                                                                                                |
| <b>O'Connor</b>    | 1994 | USA                     | Paramedic Emergency Services | Quantitative non randomised | Cross-sectional study         | Moderate      | 14000 | Prehospital reports/patients                    | <ul style="list-style-type: none"> <li>• Endotracheal tube success rate</li> <li>• Endotracheal tube missing documentation rate</li> <li>• Trauma scene times &lt;10 minutes</li> </ul>                                 |
| <b>Olasveengen</b> | 2007 | England, Sweden, Norway | Paramedic Emergency Services | Quantitative non randomised | Cross-sectional study         | Moderate      | 124   | Patients                                        | <ul style="list-style-type: none"> <li>• Chest compressions per minute</li> </ul>                                                                                                                                       |
| <b>Oostema</b>     | 2019 | USA                     | Paramedic Emergency Services | Quantitative non randomised | Cross-sectional study         | High-moderate | 1805  | Patients                                        | <ul style="list-style-type: none"> <li>• Stroke recognition rate</li> <li>• Hospital prenotification</li> <li>• Cincinnati Prehospital Stroke Scale documentation rates</li> <li>• Scene time &lt;15 minutes</li> </ul> |
| <b>Park</b>        | 2018 | South                   | Emergency                    | Quantitative                | Cross-                        | High-         | 12670 | Patients                                        | <ul style="list-style-type: none"> <li>• Prehospital return of</li> </ul>                                                                                                                                               |



|                    |      |         |                                                  |                             |                       |               |       |                    |                                                                                                                                                                                                                               |
|--------------------|------|---------|--------------------------------------------------|-----------------------------|-----------------------|---------------|-------|--------------------|-------------------------------------------------------------------------------------------------------------------------------------------------------------------------------------------------------------------------------|
|                    |      | Korea   | Operations Centre + Paramedic Emergency Services | non randomised              | sectional study       | moderate      |       |                    | spontaneous circulation                                                                                                                                                                                                       |
| <b>Persse</b>      | 2002 | USA     | Paramedic Emergency Services                     | Quantitative non randomised | Cohort study          | Low-moderate  | 151   | Patients           | <ul style="list-style-type: none"> <li>• Non-transport decision made by paramedics</li> <li>• Satisfaction level of patients</li> </ul>                                                                                       |
| <b>Riney</b>       | 2021 | USA     | Paramedic Emergency Services                     | Quantitative non randomised | Cross-sectional study | Moderate      | 256   | Patient encounters | <ul style="list-style-type: none"> <li>• Proportion of children receiving prehospital corticosteroids for asthma exacerbation</li> </ul>                                                                                      |
| <b>Scholz1</b>     | 2008 | Germany | Paramedic Emergency Services                     | Quantitative non randomised | Cross-sectional study | Moderate      | 147   | Patients           | <ul style="list-style-type: none"> <li>• Contact-to-balloon time</li> <li>• Patients transported directly to the catheterisation laboratory</li> </ul>                                                                        |
| <b>Scholz2</b>     | 2012 | Germany | Paramedic Emergency Services                     | Quantitative non randomised | Cross-sectional study | Moderate      | 1183  | Patients           | <ul style="list-style-type: none"> <li>• Proportion of contact-to-balloon time &lt; 120 minutes</li> <li>• Patients transported directly to the catheterisation laboratory</li> <li>• 1-year mortality of patients</li> </ul> |
| <b>Scholz3</b>     | 2020 | Germany | Paramedic Emergency Services                     | Quantitative non randomised | Cross-sectional study | Moderate      | 13219 | Patients           | <ul style="list-style-type: none"> <li>• Percentage of patients with prehospital electrocardiogram recordings</li> <li>• Contact-to-balloon time &lt; 90 minutes</li> <li>• In-hospital mortality</li> </ul>                  |
| <b>Scott</b>       | 2017 | Rwanda  | Paramedic Emergency Services                     | Quantitative non randomised | Cross-sectional study | High-moderate | 3822  | Patients           | <ul style="list-style-type: none"> <li>• Supplemental oxygen administration for hypoxia</li> </ul>                                                                                                                            |
| <b>Siriwardena</b> | 2014 | UK      | Paramedic Emergency Services                     | Mixed methods               | Convergent design     | High          | 12    | Ambulance services | <ul style="list-style-type: none"> <li>• Stroke care bundle delivery</li> </ul>                                                                                                                                               |
| <b>Swor</b>        | 1990 | USA     | Paramedic Emergency Services                     | Quantitative non randomised | Cross-sectional study | Moderate      | 100   | Paramedics         | <ul style="list-style-type: none"> <li>• Number of deviations from protocol</li> </ul>                                                                                                                                        |

|               |      |        |                              |                             |                       |               |      |          |                                                                                                                                                                |
|---------------|------|--------|------------------------------|-----------------------------|-----------------------|---------------|------|----------|----------------------------------------------------------------------------------------------------------------------------------------------------------------|
| <b>Tanaka</b> | 2012 | Japan  | Emergency Operations Centre  | Quantitative non randomised | Cross-sectional study | High-moderate | 4995 | Patients | <ul style="list-style-type: none"> <li>Incidence of telephone cardiopulmonary resuscitation</li> <li>Survival with favourable neurological outcomes</li> </ul> |
| <b>Todt</b>   | 2013 | Sweden | Paramedic Emergency Services | Quantitative non randomised | Cross-sectional study | Low-moderate  | 156  | Patients | <ul style="list-style-type: none"> <li>Time from electrocardiogram to decision for Primary Percutaneous Coronary Intervention</li> </ul>                       |
| <b>Weston</b> | 2018 | USA    | Paramedic Emergency Services | Quantitative non randomised | Cross-sectional study | High-moderate | 964  | Patients | <ul style="list-style-type: none"> <li>Percentage of episodes that met goal compression depth &gt;5 cm greater than 90% of the time</li> </ul>                 |

*Interventional feedback studies within EMS – Descriptive case studies (n=6)*

| Author           | Year | Country   | Context                      | MMAT category               | Study design                                  | Quality assessment | Number of participants | Professional background |
|------------------|------|-----------|------------------------------|-----------------------------|-----------------------------------------------|--------------------|------------------------|-------------------------|
| <b>Clarke</b>    | 2014 | UK        | Paramedic Emergency Services | Quantitative non randomised | Cross-sectional study                         | Low-moderate       | 8                      | Paramedic               |
| <b>Lindstrom</b> | 2011 | Sweden    | Emergency Operations Centre  | Quantitative descriptive    | Incidence/prevalence study without comparison | High               | 530                    | Patients/assignments    |
| <b>Scholz4</b>   | 2020 | Germany   | Paramedic Emergency Services | Quantitative non randomised | Cross-sectional study                         | Moderate           | 4926                   | Patients                |
| <b>Scholz5</b>   | 2021 | Germany   | Paramedic Emergency Services | Quantitative non randomised | Cross-sectional study                         | Moderate           | 20005                  | Patients                |
| <b>Stella</b>    | 2010 | Australia | Paramedic Emergency Services | Quantitative descriptive    | Incidence/prevalence study without comparison | Moderate           | 454                    | Patient encounters      |
| <b>Walters</b>   | 1992 | UK        | Paramedic Emergency          | Quantitative descriptive    | Incidence/prevalence study without comparison | High-moderate      | 190                    | Ambulance attendants    |

Services

Non-interventional feedback studies within EMS (n=6)

| Author             | Year | Country | Context                         | MMAT category               | Study design                                     | Quality assessment | Number of participants | Professional background                     |
|--------------------|------|---------|---------------------------------|-----------------------------|--------------------------------------------------|--------------------|------------------------|---------------------------------------------|
| Cash               | 2017 | USA     | Paramedic<br>Emergency Services | Quantitative<br>descriptive | Survey                                           | High-<br>moderate  | 15766                  | Emergency Medical<br>Technician + Paramedic |
| Eaton-<br>Williams | 2020 | UK      | Paramedic<br>Emergency Services | Qualitative                 | Phenomenology                                    | High               | 8                      | Emergency Medical<br>Technician + Paramedic |
| McGuire            | 2021 | USA     | Paramedic<br>Emergency Services | Quantitative<br>descriptive | Survey                                           | Moderate           | 94                     | Ambulance staff                             |
| Mock               | 1997 | USA     | Paramedic<br>Emergency Services | Quantitative<br>descriptive | Incidence/prevalence<br>study without comparison | High               | 69                     | Emergency Medical<br>Technician + Paramedic |
| Morrison           | 2017 | Canada  | Paramedic<br>Emergency Services | Qualitative                 | Interpretive descriptive<br>analysis             | High               | 12                     | Paramedic                                   |
| Wilson             | 2022 | UK      | Paramedic<br>Emergency Services | Qualitative                 | Thematic analysis                                | High               | 24                     | Emergency Medical<br>Technician + Paramedic |

## Appendix 4: Quality assessment

| <i>Qualitative Studies</i> | Are there clear research questions? | Do the collected data allow to address the research questions? | Is the qualitative approach appropriate to answer the research question? | Are the qualitative data collection methods adequate to address the research question? | Are the findings adequately derived from the data? | Is the interpretation of results sufficiently substantiated by data? | Is there coherence between qualitative data sources, collection, analysis and interpretation? |
|----------------------------|-------------------------------------|----------------------------------------------------------------|--------------------------------------------------------------------------|----------------------------------------------------------------------------------------|----------------------------------------------------|----------------------------------------------------------------------|-----------------------------------------------------------------------------------------------|
| Brink                      | Yes                                 | Yes                                                            | Yes                                                                      | Yes                                                                                    | Yes                                                | Yes                                                                  | Yes                                                                                           |
| Eaton-Williams             | Yes                                 | Yes                                                            | Yes                                                                      | Yes                                                                                    | Yes                                                | Yes                                                                  | Yes                                                                                           |
| Morrison                   | Yes                                 | Yes                                                            | Yes                                                                      | Yes                                                                                    | Yes                                                | Yes                                                                  | Yes                                                                                           |
| Wilson                     | Yes                                 | Yes                                                            | Yes                                                                      | Yes                                                                                    | Yes                                                | Yes                                                                  | Yes                                                                                           |

| <i>Quantitative non randomised studies</i> | Are there clear research questions? | Do the collected data allow to address the research questions? | Are the participants representative of the target population? | Are measurements appropriate regarding both the outcome and intervention? | Are there complete outcome data? | Are the confounders accounted for in the design and analysis? | During the study periods, is the intervention administered as intended? |
|--------------------------------------------|-------------------------------------|----------------------------------------------------------------|---------------------------------------------------------------|---------------------------------------------------------------------------|----------------------------------|---------------------------------------------------------------|-------------------------------------------------------------------------|
| Bahouth                                    | Yes                                 | Yes                                                            | Can't tell                                                    | Yes                                                                       | Yes                              | No                                                            | Can't tell                                                              |
| Bleijenberg                                | Yes                                 | Yes                                                            | Yes                                                           | Yes                                                                       | Yes                              | No                                                            | Yes                                                                     |
| Bobrow2                                    | Yes                                 | Yes                                                            | Yes                                                           | Yes                                                                       | Yes                              | Yes                                                           | Yes                                                                     |
| Choi                                       | Yes                                 | Yes                                                            | Can't tell                                                    | Yes                                                                       | Yes                              | No                                                            | Can't tell                                                              |
| Clarke                                     | Yes                                 | Yes                                                            | Can't tell                                                    | No                                                                        | Yes                              | No                                                            | Yes                                                                     |
| Clawson                                    | Yes                                 | Yes                                                            | Yes                                                           | Yes                                                                       | Yes                              | No                                                            | Can't tell                                                              |
| Daudelin                                   | Yes                                 | Yes                                                            | Yes                                                           | Yes                                                                       | Yes                              | Yes                                                           | Yes                                                                     |
| DelliFraine                                | Yes                                 | Yes                                                            | Yes                                                           | Yes                                                                       | Yes                              | Yes                                                           | Yes                                                                     |
| Ebbs                                       | Yes                                 | Yes                                                            | Can't tell                                                    | Yes                                                                       | No                               | No                                                            | Can't tell                                                              |
| Eckstein                                   | Yes                                 | Yes                                                            | Yes                                                           | Yes                                                                       | Yes                              | No                                                            | Can't tell                                                              |
| Gropen                                     | Yes                                 | Yes                                                            | Yes                                                           | Yes                                                                       | Yes                              | No                                                            | Can't tell                                                              |
| Hardeland                                  | Yes                                 | Yes                                                            | Yes                                                           | Yes                                                                       | Yes                              | No                                                            | Can't tell                                                              |
| Hermans                                    | Yes                                 | Yes                                                            | Yes                                                           | Yes                                                                       | Yes                              | Yes                                                           | Can't tell                                                              |
| Hopkins                                    | Yes                                 | Yes                                                            | Yes                                                           | Yes                                                                       | Yes                              | Yes                                                           | Can't tell                                                              |
| Hubner                                     | Yes                                 | Yes                                                            | Yes                                                           | Yes                                                                       | Yes                              | Yes                                                           | Can't tell                                                              |
| Joyce                                      | Yes                                 | Yes                                                            | Yes                                                           | Yes                                                                       | Yes                              | No                                                            | Can't tell                                                              |
| Lukas                                      | Yes                                 | Yes                                                            | Yes                                                           | Yes                                                                       | Yes                              | Yes                                                           | Can't tell                                                              |
| Lyon                                       | Yes                                 | Yes                                                            | Yes                                                           | Yes                                                                       | Yes                              | No                                                            | Can't tell                                                              |
| Niles                                      | Yes                                 | Yes                                                            | Yes                                                           | Yes                                                                       | Yes                              | No                                                            | Can't tell                                                              |
| O'Connor                                   | Yes                                 | Yes                                                            | Yes                                                           | Yes                                                                       | Yes                              | No                                                            | Can't tell                                                              |
| Olasveengen                                | Yes                                 | Yes                                                            | Yes                                                           | Yes                                                                       | Yes                              | No                                                            | Can't tell                                                              |
| Oostema                                    | Yes                                 | Yes                                                            | Yes                                                           | Yes                                                                       | Yes                              | Yes                                                           | Can't tell                                                              |
| Park                                       | Yes                                 | Yes                                                            | Yes                                                           | Yes                                                                       | Yes                              | Yes                                                           | Can't tell                                                              |
| Persse                                     | Yes                                 | Yes                                                            | Can't tell                                                    | Yes                                                                       | Yes                              | No                                                            | Can't tell                                                              |
| Riney                                      | Yes                                 | Yes                                                            | Yes                                                           | Yes                                                                       | Yes                              | No                                                            | Can't tell                                                              |

|         |     |     |            |     |     |     |            |
|---------|-----|-----|------------|-----|-----|-----|------------|
| Scholz1 | Yes | Yes | Yes        | Yes | Yes | No  | Can't tell |
| Scholz2 | Yes | Yes | Yes        | Yes | Yes | No  | Can't tell |
| Scholz3 | Yes | Yes | Yes        | Yes | Yes | No  | Can't tell |
| Scholz4 | Yes | Yes | Yes        | Yes | Yes | No  | Can't tell |
| Scholz5 | Yes | Yes | Yes        | Yes | Yes | No  | Can't tell |
| Scott   | Yes | Yes | Yes        | Yes | Yes | Yes | Can't tell |
| Swor    | Yes | Yes | Yes        | Yes | Yes | No  | Can't tell |
| Tanaka  | Yes | Yes | Yes        | Yes | Yes | Yes | Can't tell |
| Todt    | Yes | Yes | Can't tell | Yes | Yes | No  | Can't tell |
| Weston  | Yes | Yes | Yes        | Yes | Yes | Yes | Can't tell |

| <i>Quantitative descriptive studies</i> | Are there clear research questions? | Do the collected data allow to address the research questions? | Is the sampling strategy relevant to address the research question? | Is the sample representative of the target population? | Are the measurements appropriate? | Is the risk of nonresponse bias low? | Is the statistical analysis appropriate to answer the research question? |
|-----------------------------------------|-------------------------------------|----------------------------------------------------------------|---------------------------------------------------------------------|--------------------------------------------------------|-----------------------------------|--------------------------------------|--------------------------------------------------------------------------|
| Cash                                    | Yes                                 | Yes                                                            | Yes                                                                 | Can't tell                                             | Yes                               | Can't tell                           | Yes                                                                      |
| Gevers                                  | Yes                                 | Yes                                                            | Yes                                                                 | Can't tell                                             | Yes                               | Can't tell                           | Yes                                                                      |
| Lindstrom                               | Yes                                 | Yes                                                            | Yes                                                                 | Yes                                                    | Yes                               | Yes                                  | Yes                                                                      |
| McGuire                                 | Yes                                 | Yes                                                            | Yes                                                                 | Can't tell                                             | Yes                               | Can't tell                           | Yes                                                                      |
| Mock                                    | Yes                                 | Yes                                                            | Yes                                                                 | Yes                                                    | Yes                               | Yes                                  | Yes                                                                      |
| Stella                                  | Yes                                 | Yes                                                            | Yes                                                                 | Can't tell                                             | Yes                               | Can't tell                           | Yes                                                                      |
| Walters                                 | Yes                                 | Yes                                                            | Yes                                                                 | Yes                                                    | Yes                               | Can't tell                           | Yes                                                                      |

| <i>Mixed methods studies</i> | Are there clear research questions? | Do the collected data allow to address the research questions? | Is there an adequate rationale for using a mixed methods design to address the research question? | Are the different components of the study effectively integrated to answer the research question? | Are the outputs of the integration of qualitative and quantitative components adequately interpreted? | Are divergences and inconsistencies between quantitative and qualitative results adequately addressed? | Do the different components of the study adhere to the qualitative criteria of each tradition of the methods involved? |
|------------------------------|-------------------------------------|----------------------------------------------------------------|---------------------------------------------------------------------------------------------------|---------------------------------------------------------------------------------------------------|-------------------------------------------------------------------------------------------------------|--------------------------------------------------------------------------------------------------------|------------------------------------------------------------------------------------------------------------------------|
| Noble                        | Yes                                 | Yes                                                            | Yes                                                                                               | Yes                                                                                               | Yes                                                                                                   | Yes                                                                                                    | Yes                                                                                                                    |
| Siriwardena                  | Yes                                 | Yes                                                            | Yes                                                                                               | Yes                                                                                               | Yes                                                                                                   | Yes                                                                                                    | Yes                                                                                                                    |

**Appendix 5: Subgroup analyses by feedback type, feedback source, recipient level, feedback alone, aggregation level and format**

|                                          | d    | 95% CI     | p       | I <sup>2</sup> | 95% CI    | p <sub>Subgroup</sub> |
|------------------------------------------|------|------------|---------|----------------|-----------|-----------------------|
| <b>Study quality</b>                     |      |            |         |                |           | <b>0.517</b>          |
| ▪ High                                   | 0.24 | -0.27-0.76 | 0.352   | 0.99           | 0.98-1.00 |                       |
| ▪ High-moderate                          | 0.46 | -0.64-1.57 | 0.452   | 0.98           | 0.89-0.99 |                       |
| ▪ Moderate                               | 0.63 | -0.46-1.72 | 0.180   | 0.97           | 0.92-0.98 |                       |
| ▪ Low-moderate                           | 0.41 | -0.77-1.59 | 0.619   | 0.97           | 0.92-0.99 |                       |
| <b>Feedback type</b>                     |      |            |         |                |           | <b>0.405</b>          |
| ▪ Audit & feedback                       | 0.56 | 0.37-0.75  | <0.001* | 0.99           | 0.97-0.99 |                       |
| ▪ Feedback combined                      | 0.43 | -0.23-1.09 | 0.592   | 0.98           | 0.95-1.00 |                       |
| ▪ Peer-to-peer feedback                  | 0.01 | -0.91-0.92 | 0.135   | 0.98           | 0.93-1.00 |                       |
| ▪ Post-event debriefing                  | 0.10 | -1.25-1.45 | 0.429   | -              | -         |                       |
| <b>Feedback source</b>                   |      |            |         |                |           | <b>0.787</b>          |
| ▪ Hospital                               | 0.63 | -2.00-3.26 | 0.798   | 0.97           | 0.85-1.00 |                       |
| ▪ Researchers                            | 0.47 | -1.93-2.87 | 0.572   | 0.98           | 0.89-0.99 |                       |
| ▪ Electronic dashboard                   | 0.81 | -0.37-2.00 | 0.172   | -              | -         |                       |
| ▪ Ambulance service managers             | 0.61 | -1.80-3.01 | 0.731   | 0.99           | 0.92-0.99 |                       |
| ▪ Medical director                       | 0.61 | -1.76-3.31 | 0.774   | 0.97           | 0.92-1.00 |                       |
| ▪ Peers                                  | 0.01 | -2.56-2.58 | 0.249   | 0.98           | 0.93-1.00 |                       |
| ▪ Unclear                                | 0.40 | -2.03-2.84 | 0.515   | 0.96           | 0.90-0.99 |                       |
| <b>Recipient level</b>                   |      |            |         |                |           | <b>0.535</b>          |
| ▪ Individual                             | 0.71 | 0.35-1.06  | <0.001* | 0.99           | 0.92-1.00 |                       |
| ▪ Individual + organisation              | 0.09 | -0.90-1.09 | 0.061   | 0.97           | 0.85-1.00 |                       |
| ▪ Individual + team                      | 0.37 | -0.55-1.30 | 0.250   | 0.98           | 0.95-1.00 |                       |
| ▪ Organisation                           | 0.54 | -0.35-1.43 | 0.542   | 0.99           | 0.98-1.00 |                       |
| ▪ Team                                   | 0.50 | -0.32-1.31 | 0.365   | 0.88           | 0.69-0.95 |                       |
| ▪ Unclear                                | 0.62 | -0.58-1.81 | 0.836   | 0.32           | 0.00-0.96 |                       |
| <b>Feedback alone</b>                    |      |            |         |                |           | <b>0.379</b>          |
| ▪ Feedback alone                         | 0.58 | -0.09-1.26 | 0.902   | 0.99           | 0.95-0.99 |                       |
| ▪ Feedback + educational intervention    | 0.56 | 0.27-0.84  | <0.001* | 0.99           | 0.95-0.99 |                       |
| ▪ Feedback + organisational intervention | 0.31 | -0.41-1.03 | 0.251   | 0.98           | 0.96-0.99 |                       |
| <b>Level of aggregation</b>              |      |            |         |                |           | <b>0.381</b>          |
| ▪ Individual                             | 0.51 | -0.35-1.12 | 0.341   | 0.97           | 0.91-0.98 |                       |
| ▪ Aggregate                              | 0.73 | 0.35-1.12  | <0.001* | 0.99           | 0.98-1.00 |                       |
| ▪ Individual + aggregate                 | 0.43 | -0.44-1.31 | 0.221   | 0.96           | 0.92-0.98 |                       |
| ▪ Unclear                                | 0.16 | -0.92-1.24 | 0.101   | 0.38           | 0.00-0.99 |                       |
| <b>Format</b>                            |      |            |         |                |           | <b>0.703</b>          |
| ▪ Verbal                                 | 0.55 | -0.44-1.55 | 0.508   | 0.89           | 0.72-0.96 |                       |
| ▪ Written                                | 0.47 | -0.46-1.39 | 0.681   | 0.98           | 0.96-0.99 |                       |
| ▪ Verbal + written                       | 0.72 | -0.36-1.81 | 0.273   | 1.00           | 0.98-1.00 |                       |
| ▪ Unclear                                | 0.37 | -0.07-0.80 | 0.097   | 0.94           | 0.00-0.90 |                       |

**Appendix 6: Unstandardized effect sizes for remaining evaluative interventional studies of feedback within EMS**

| Author and year  | Outcome category         | Outcome measure                                             | Effect direction | Unstandardized effect size                                            |
|------------------|--------------------------|-------------------------------------------------------------|------------------|-----------------------------------------------------------------------|
| Riney 2021       | Protocol adherence       | Proportion receiving systematic prehospital corticosteroids | Positive         | Centreline shifted from 0% to 34%                                     |
| Gropen 2019      | Clinical decision-making | Ability of EMS providers to predict large vessel occlusion  | Positive         | Area under the curve 0.61 (95% CI: .44-.77) to 0.74 (95% CI: .64-.84) |
| DelliFraine 2013 | Ambulance times          | Symptom to balloon time                                     | Positive         | Median 195min to 162min, p<0.001                                      |
